# Supplementary material
Source: Springer Nature journal article supplement (https://www.springermedizin.de/resource/supplementary/13075_2005_1664_MOESM3_ESM.pdf/9690292)

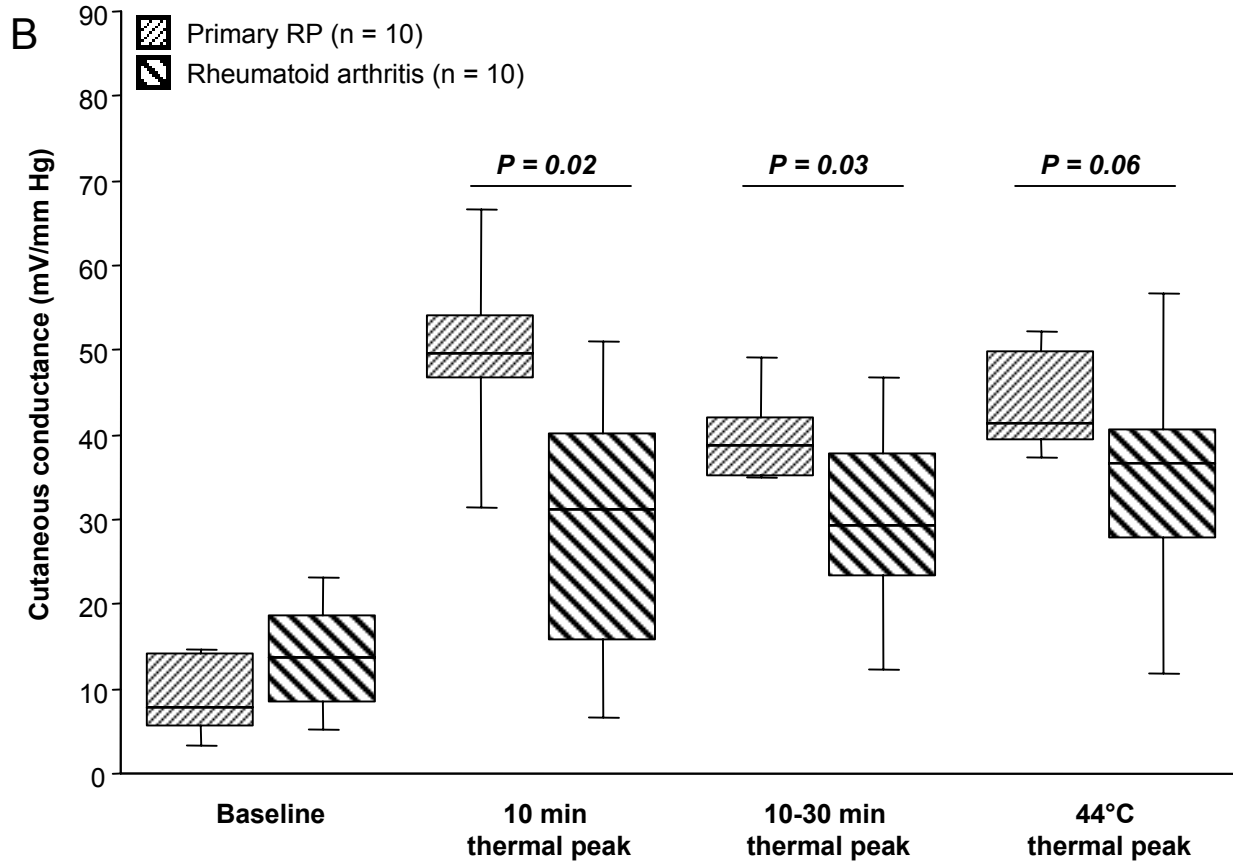

Supplement: MOESM3 [file 9690292]
